# Supplementary material
Source: MDPI journal article supplement (https://www.mdpi.com/2571-6255/6/1/14)
Supplement: s1 [file s1]

## **Supplementary Materials**

# **Synthesis of High-Efficiency, Eco-friendly, and Synergistic Flame Retardant for Epoxy Resin**

*Jiaxiang Gao, Hanguang Wu\*, Yang Xiao, Wenjing Ma, Fei Xu, Rui Wang, and Zhiguo Zhu\**

((Optional Dedication))

J. X. Gao, Dr H. G. Wu, Y. Xiao, W. J. Ma, F. Xu, Prof. R. Wang, Prof. Z. G. Zhu

School of Materials Design and Engineering, Beijing Key Laboratory of Clothing Materials R & D and Assessment, Beijing Institute of Fashion Technology, 100029, Beijing, China

E-mail: [hanguangwu@bift.edu.cn](mailto:hanguangwu@bift.edu.cn), [clyzzg@bift.edu.cn](mailto:clyzzg@bift.edu.cn)

## **Table of contents**

1. Supplementary Figures
2. Supplementary Tables

## 1. Supplementary Figures

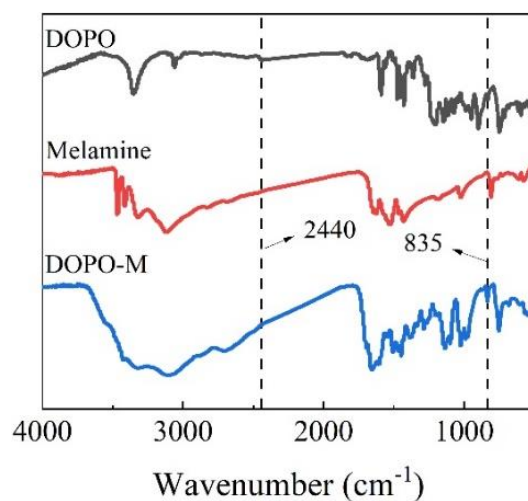

Figure S1. The FTIR spectra of DOPO, Melamine, and DOPO-M.

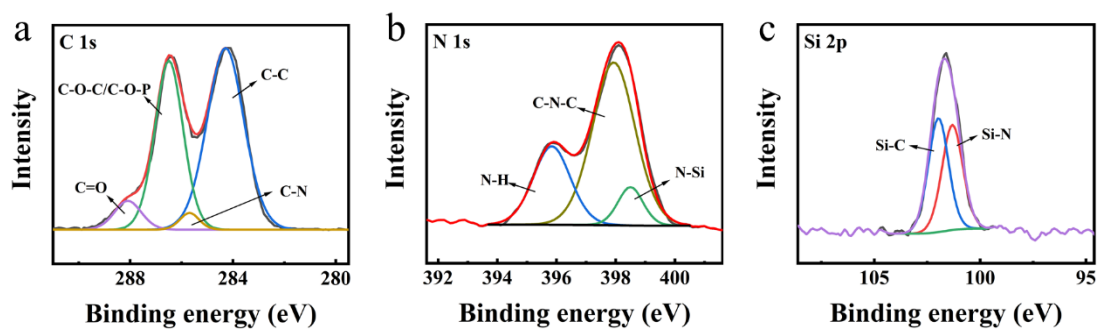

Figure S2. High-resolution XPS spectra for (a) C 1s; (b) N 1s; and (c) Si 2p of DOPO-M-rGO.

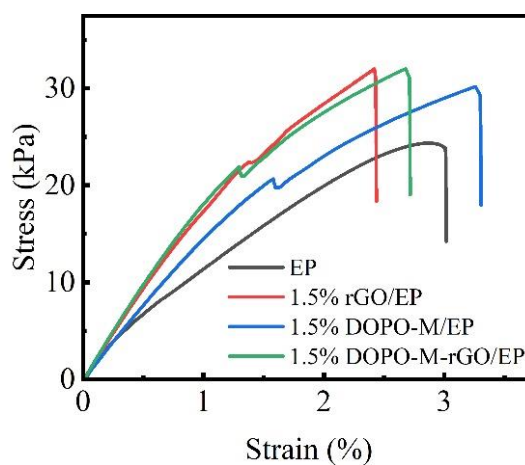

Figure S3. Stress-strain curves of pure EP, 1.5% rGO/EP composite, 1.5% DOPO-M/EP composite, and 1.5% DOPO-M-rGO/EP composite.

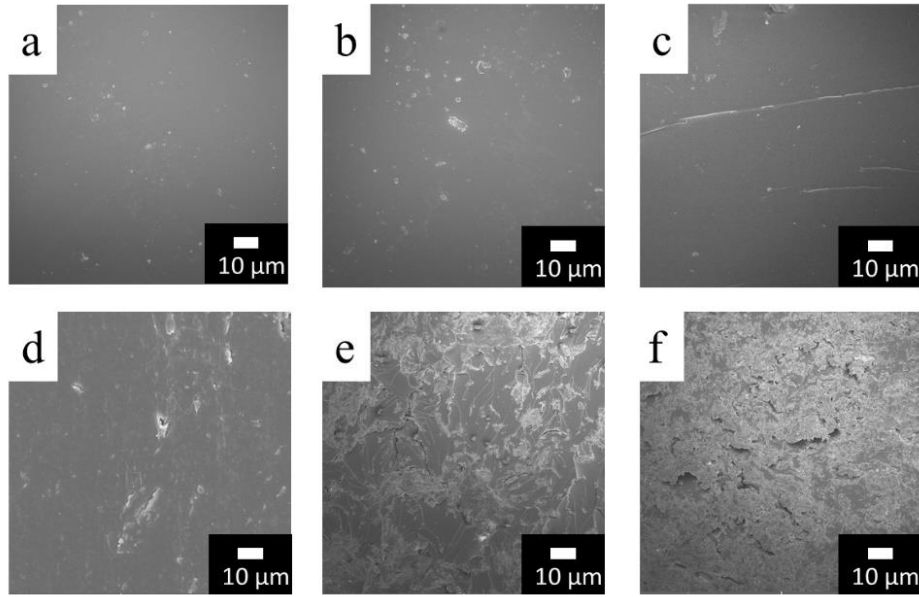

Figure S4. SEM images of (a) 0.5% DOPO-M-rGO/EP; (b) 1% DOPO-M-rGO/EP; (c) 1.5% DOPO-M-rGO/EP; (d) 2% DOPO-M-rGO/EP; (e) 3% DOPO-M-rGO/EP; (f) 5% DOPO-M-rGO/EP.

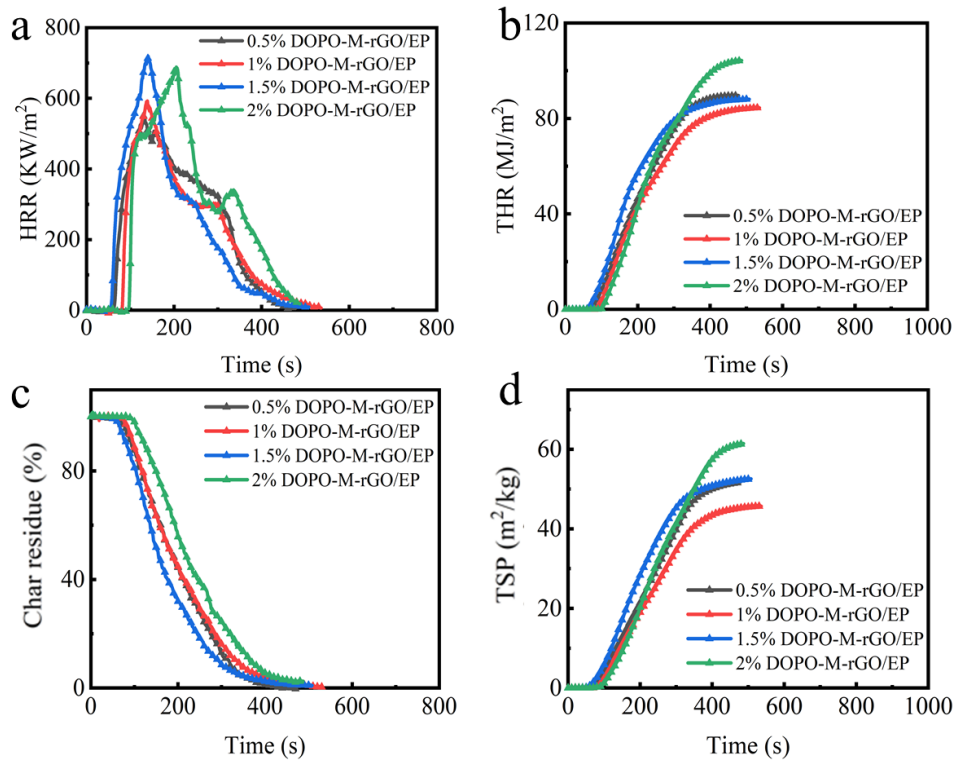

Figure S5. (a) Heat release rate; (b) total heat release; (c) char residue curves; (d) total smoke production of DOPO-M-rGO/EP composites with different DOPO-M-rGO contents under an external heat flux of 35 kW/m<sup>2</sup>.

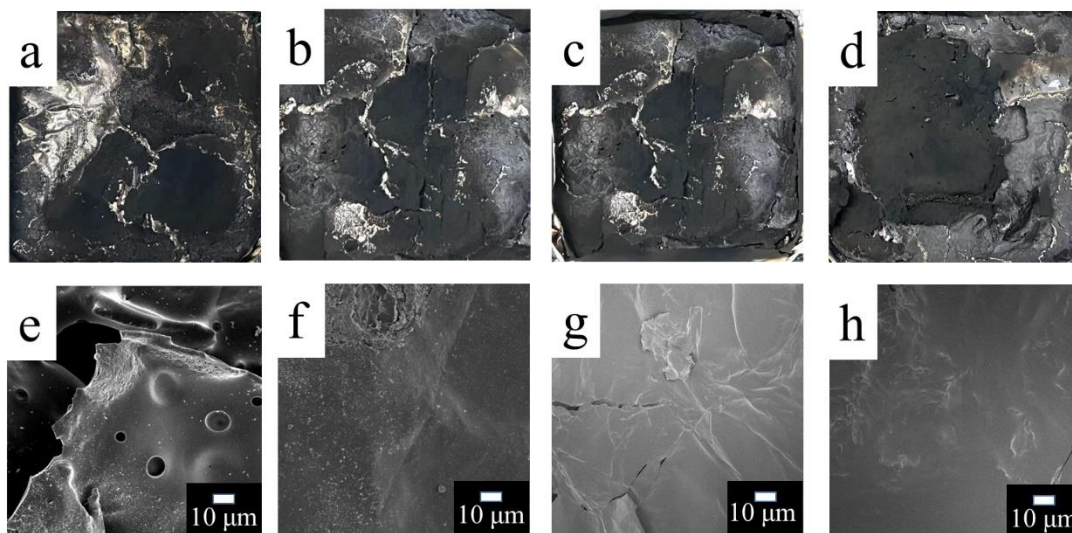

Figure S6. Digital images of char residues for (a) 0.5% DOPO-M-rGO/EP; (b) 1% DOPO-M-rGO/EP; (c) 1.5% DOPO-M-rGO/EP; (d) 2% DOPO-M-rGO/EP and SEM images of char residues for (e) 0.5% DOPO-M-rGO/EP; (f) 1% DOPO-M-rGO/EP; (g) 1.5% DOPO-M-rGO/EP; (h) 2% DOPO-M-rGO/EP after cone calorimeter test.

## 2. Supplementary Tables

Table S1. Performance comparison of the graphene-based flame retardants.

| Flame retardant              | Amount of<br>flame retardant<br>added (wt%) | Cone Calorimeter Test |         |                      | UL-94 Rating | Ref.       |
|------------------------------|---------------------------------------------|-----------------------|---------|----------------------|--------------|------------|
|                              |                                             | pHRR (%)              | THR (%) | TSP (%) <sup>a</sup> |              |            |
| DOPO-M-rGO                   | 1.5                                         | 55                    | 30      | 20                   | V-0          | This paper |
| F-RGO-CuMoO <sub>4</sub>     | 2                                           | 60                    | 44      | 62                   | V-1          | S1         |
| ZnPhP-PGO                    | 3                                           | 41                    | 17      | 6                    | V-0          | S2         |
| PPGO                         | 3                                           | 42                    | 22      | 24                   | -            | S3         |
| RGO@Ni(OH) <sub>2</sub>      | 2                                           | 32                    | 9       | 8                    | V-2          | S4         |
| PN-rGO                       | 5                                           | 31                    | 29      | 51                   | V-1          | S5         |
| RGO-PANI/Ni(OH) <sub>2</sub> | 3                                           | 40                    | 11      | 36                   | NR           | S6         |
| rGO@ZnPb                     | 5                                           | 39                    | 31      | 34                   | V-0          | S7         |
| SBA-15-RGO-ZHS               | 3                                           | 56                    | 27      | 38                   | V-1          | S8         |
| OapPOSS-rGO                  | 2                                           | 49                    | 37      | -22                  | -            | S9         |
| ZIF8/rGO                     | 2                                           | 65                    | 34      | 42                   | V-1          | S10        |

*a*: The negative number indicates an increased value.

Table S2. Performance comparison of the DOPO-based flame retardants.

| Flame retardant | Amount of<br>flame retardant<br>added (wt%) | Cone Calorimeter Test |         |                      | UL-94 Rating | Ref.       |
|-----------------|---------------------------------------------|-----------------------|---------|----------------------|--------------|------------|
|                 |                                             | pHRR (%)              | THR (%) | TSP (%) <sup>a</sup> |              |            |
| DOPO-M-rGO      | 1.5                                         | 55                    | 30      | 20                   | V-0          | This paper |
| DOPO-MMT        | 6                                           | 55                    | 20      | 9                    | V-0          | S11        |
| 30DOPO-P-KC     | 5                                           | 51                    | 27      | 20                   | V-0          | S12        |
| DOPO/AHPP       | 5                                           | 59                    | 45      | 14                   | V-0          | S13        |
| FR-CNTs         | 8                                           | 31                    | 49      | -15                  | V-0          | S14        |
| DOPO@ZIF-67     | 4                                           | 11                    | 6       | -53                  | V-0          | S15        |
| DOPO-CuPc       | 20                                          | 58                    | 57      | 22                   | V-0          | S16        |
| AVD             | 10                                          | 61                    | 17      | 15                   | V-0          | S17        |
| HPDAI           | 2                                           | 25                    | 25      | 23                   | V-0          | S18        |
| DEN438/D/F      | 2.5                                         | 31                    | -6      | 49                   | NR           | S19        |
| PDTT            | 10                                          | 31                    | 26      | -32                  | V-0          | S20        |

*a*: The negative number indicates an increased value.

Table S3. Performance comparison of the flame retardants based on DOPO-functionalized rGO.

| Flame retardant | Amount of<br>flame retardant<br>added (wt%) | Cone Calorimeter Test |         |                      | UL-94 Rating | Ref.       |
|-----------------|---------------------------------------------|-----------------------|---------|----------------------|--------------|------------|
|                 |                                             | pHRR (%)              | THR (%) | TSP (%) <sup>a</sup> |              |            |
| DOPO-M-rGO      | 1.5                                         | 55                    | 30      | 20                   | V-0          | This paper |
| GP-DOPO         | 2                                           | 27                    | 32      | 31                   | V-2          | S21        |
| DOPO-VTES-GO    | 5                                           | 45                    | 41      | 36                   | -            | S22        |
| DGO             | 10                                          | 38                    | 46      | -                    | V-0          | S23        |
| GNS/DOPO        | 5                                           | 67                    | 34      | -14                  | -            | S24        |
| OapPOSS-rGO     | 2                                           | 49                    | 36      | -22                  | -            | S25        |
| GO-DOPO-V       | 2                                           | 29                    | 16      | -                    | -            | S26        |
| DOPO-V-PA       | 3                                           | 22                    | 9       | -                    | -            | S27        |
| FRs-rGO         | 5                                           | 35                    | -       | -                    | V-0          | S28        |
| Graphene-DOPO   | 3                                           | 39                    | 25      | 30                   | V-1          | S29        |
| PD-rGO          | 4                                           | 43                    | 30      | 32                   | V-1          | S30        |
| FRGO            | 3                                           | 34                    | 14      | 30                   | V-1          | S31        |
| f-rGO           | 3                                           | 31                    | 34      | 10                   | -            | S32        |

<sup>a</sup>: The negative number indicates an increased value.

Table S4. LOI and UL-94 test results of the pure EP and the EP-based composites with 1.5% rGO, 1.5% DOPO-M, and different contents of DOPO-M-rGO as the additives.

| Sample             | LOI (%) | UL-94 |
|--------------------|---------|-------|
| pure EP            | 25      | NR    |
| 1.5% rGO/EP        | 25      | NR    |
| 1.5% DOPO-M/EP     | 25      | NR    |
| 0.5% DOPO-M-rGO/EP | 28      | V-2   |
| 1% DOPO-M-rGO/EP   | 32      | V-1   |
| 1.5% DOPO-M-rGO/EP | 32      | V-0   |
| 2% DOPO-M-rGO/EP   | 32      | V-0   |

Table S5. Cone calorimeter data of the EP-based composites with different DOPO-M-rGO contents.

| Sample             | pHRR<br>(kW/m <sup>2</sup> ) | THR<br>(MJ/m <sup>2</sup> ) | TSP<br>(m <sup>2</sup> /kg) |
|--------------------|------------------------------|-----------------------------|-----------------------------|
| 0.5% DOPO-M-rGO/EP | 551                          | 90                          | 51                          |
| 1% DOPO-M-rGO/EP   | 592                          | 85                          | 46                          |
| 1.5% DOPO-M-rGO/EP | 719                          | 88                          | 52                          |
| 2% DOPO-M-rGO/EP   | 688                          | 104                         | 61                          |

### 3. Supplementary References

- S1 W.Z. Xu, X.L. Wang, X.J. Wu, et al. Organic-Inorganic dual modified graphene: Improving the dispersibility of graphene in epoxy resin and the fire safety of epoxy resin. *Polym. Degrad. Stabil.* 2019; 165: 80-91, <https://doi.org/10.1016/j.polymdegradstab.2019.04.023>.
- S2 X. Wang, T. Chen, J. Hong, et al. In-situ growth of metal-organophosphorus nanosheet/nanorod on graphene for enhancing flame retardancy and mechanical properties of epoxy resin. *Compos. Part B-Eng.* 2020; 200: 108271, <https://doi.org/10.1016/j.compositesb.2020.108271>.
- S3 M.H. Zhu, L. Liu, Z.Z. Wang. Iron-phosphorus-nitrogen functionalized reduced graphene oxide for epoxy resin with reduced fire hazards and improved impact toughness. *Compos. Part B-Eng.* 2020; 199: 108283, <https://doi.org/10.1016/j.compositesb.2020.108283>.
- S4 Y.Z. Feng, G.J. Han, B. Wang, et al. Multiple synergistic effects of graphene-based hybrid and hexagonal born nitride in enhancing thermal conductivity and flame retardancy of epoxy. *Chem. Eng. J.* 2020; 379: 122402, <https://doi.org/10.1016/j.cej.2019.122402>.
- S5 Y.Z. Feng, C.G. He, Y.F. Wen, et al. Superior flame retardancy and smoke suppression of epoxy-based composites with phosphorus/nitrogen co-doped graphene. *J. Hazard Mater.* 2018; 346: 140-151, <https://doi.org/10.1016/j.jhazmat.2017.12.019>.
- S6 W.W. Guo, X. Wang, Y. Pan, et al. Polyaniline-coupled graphene/nickel hydroxide nanohybrids as flame retardant and smoke suppressant for epoxy composites. *Polym. Advan. Technol.* 2019; 30(8): 1959-1967, <https://doi.org/10.1002/pat.4628>.
- S7 L.J. Qu, Y.L. Sui, C.L. Zhang, et al. POSS-functionalized graphene oxide hybrids with improved dispersive and smoke-suppressive properties for epoxy flame-retardant application. *Eur. Polym. J.* 2020; 122: 109383, <https://doi.org/10.1016/j.eurpolymj.2019.109383>.
- S8 X. Wang, T. Chen, C.H. Peng, et al. Synergistic Effect of Mesoporous Nanocomposites with Different Pore Sizes and Structures on Fire Safety and Smoke Suppression of Epoxy Resin. *Macromol. Mater. Eng.* 2019; 305(2): 1900640, <https://doi.org/10.1002/mame.201900640>.
- S9 X.D. Qian, L. Song, B. Yu, et al. Novel organic-inorganic flame retardants containing exfoliated graphene: preparation and their performance on the flame retardancy of epoxy resins. *J. Mater. Chem. A* 2013; 1: 6822-6830, <https://doi.org/10.1039/C3TA10416H>.
- S10 B.L. Xu, W.Z. Xu, G.S. Wang, et al. Zeolitic imidazolate frameworks-8 modified graphene as a green flame retardant for reducing the fire risk of epoxy resin. *Polym. Advan. Technol.* 2018; 29(6): 1733-1743, <https://doi.org/10.1002/pat.4278>.
- S11 J.M. Geng, J.Y. Qin, J.Y. He. Preparation of Intercalated Organic Montmorillonite DOPO-MMT by Melting Method and Its Effect on Flame Retardancy to Epoxy Resin. *Polymers-Basel* 2021; 13(20): 3496, <https://doi.org/10.3390/polym13203496>.
- S12 N. Wang, H.W. Teng, L. Li, et al. Synthesis of Phosphated K-Carrageenan and Its Application for Flame-Retardant Waterborne Epoxy. *Polymers-Basel* 2018; 10(11): 1268, <https://doi.org/10.3390/polym10111268>.
- S13 Y. Yuan, B. Yu, Y.Q. Shi, et al. Insight into Hyper-Branches Aluminum Phosphonate in Combination with Multiple Phosphorus Synergies for Fire-Safe Epoxy Resin Composites. *Polymers-Basel* 2020; 12(1): 64, <https://doi.org/10.3390/polym12010064>.
- S14 Y.Z. Zhang, C.L. Shi, X.D. Qian, et al. DOPO/Silicon/CNT Nanohybrid Flame Retardants: Toward Improving the Fire Safety of Epoxy Resins. *Polymers-Basel* 2022; 14(3): 565, <https://doi.org/10.3390/polym14030565>.
- S15 L.Y. Cai, F. Xin, C.C. Zhai, et al. The effects of DOPO modified Co-based metalorganic framework



- on flame retardancy, stiffness and thermal stability of epoxy resin. *RSC. Adv.* 2021; 11(12): 6781-6790, <https://doi.org/10.1039/D0RA08982F>.
- S16 M. Zhi, Q. Liu, H. Chen, et al. Thermal Stability and Flame Retardancy Properties of Epoxy Resin Modified with Functionalized Graphene Oxide Containing Phosphorus and Silicon Elements. *Acs Omega* 2019; 4: 10975, <https://doi.org/10.1021/acsomega.9b00852>.
- S17 R.R. Zhou, L.J. Lin, B.R. Zeng, et al. Diblock Copolymers Containing Titanium-Hybridized Polyhedral Oligomeric Silsesquioxane Used as a Macromolecular Flame Retardant for Epoxy Resin. *Polymers-Basel* 2022; 14(9): 1708, <https://doi.org/10.3390/polym14091708>.
- S18 P.F. Ji, Y.H. Cui, D.Y. Liu, et al. The Bi-DOPO derivative functionalized graphene oxide: Preparation and its flame-retardation on epoxy resin. *Polym. Advan. Technol.* 2021; 32: 2843-2855, <https://doi.org/10.1002/pat.5286>.
- S19 W. Michael, D. Manfred. N-phosphorylated Iminophosphoranes based on 9, 10-Dihydro-9-oxa-10-phosphaphenanthrene-10-oxide and their flame-retardant behavior in epoxy resins. *J. Appl. Polym. Sci.* 2020; 138(9): 49902, <https://doi.org/10.1002/app.49902>.
- S20 B. Alexander, M. Patrick, B. Annabelle, et al. Hyperbranched Rigid Aromatic Phosphorus-Containing Flame Retardants for Epoxy Resins. *Macromol. Mater. Eng.* 2021; 306(4): 2000731, <https://doi.org/10.1002/mame.202000731>.
- S21 P.F. Qin, D.Q. Yi, J.W. Hao, et al. Fabrication of melamine trimetaphosphate 2D supermolecule and its superior performance on flame retardancy, mechanical and dielectric properties of epoxy resin. *Compos. Part B-Eng.* 2021; 225: 109269, <https://doi.org/10.1016/j.compositesb.2021.109269>.
- S22 A. Amer, B. Szolnoki, M. Gyrgy. Improving thermal and flame retardant properties of sorbitol-based bioepoxy systems by phosphorus-based flame retardants. *Fire Mater.* 2021; 46: 605-614, <https://doi.org/10.1002/fam.3010>.
- S23 L. Li, X.M. Shao, Z. Zhao, et al. Synergistic Fire Hazard Effect of a Multifunctional Flame Retardant in Building Insulation Expandable Polystyrene through a Simple Surface-Coating Method. *Acs Omega* 2020; 5(1): 799-807, <https://doi.org/10.1021/acsomega.9b03541>.
- S24 S. Liu, Z.P. Fang, H.Q. Yan, et al. Superior flame retardancy of epoxy resin by the combined addition of graphene nanosheets and DOPO. *Rsc. adv.* 2016; 6(7): 5288-5295, <https://doi.org/10.1039/c5ra25988f>.
- S25 X. Wang, L. Song, H.Y. Yang, et al. Simultaneous reduction and surface functionalization of graphene oxide with POSS for reducing fire hazards in epoxy composites. *J. Mater. Chem.* 2012; 22(41), 22037-22043, <https://doi.org/10.1039/C2JM35479A>.
- S26 F.Y. Wu, X.H. Bao, J.B. Wang. One-Step Reduction of Graphene Oxide with Phosphorus/Silicon-Containing Compound and Its Flame Retardancy in Epoxy Resin. *Polymers-Basel* 2021; 13(22), 3985, <https://doi.org/10.3390/polym13223985>.
- S27 J.B. Wang. A Novel Phosphorus/Silicon-Containing Flame Retardant—Functionalized Graphene Nanocomposite: Preparation, Characterization and Flame Retardancy. *Russ. J. Appl. Chem.* 2021; 93(12): 1931-1939, <https://doi.org/10.1016/j.matchemphys.2012.05.082>.
- S28 L.Y. Wang, J.J. Zhu, H.B. Deng, et al. Improved Pyrolysis Performance of a Cyclic Phosphate-Melamine Intumescent Fire-Retardant Coating System Using Ceria as an Additive. *Chemistryselect* 2022; 7: e202200062, <https://doi.org/10.1002/slct.202200062>.
- S29 F. Sun, T. Yu, C.Q. Hu, et al. Influence of functionalized graphene by grafted phosphorus containing flame retardant on the flammability of carbon fiber/epoxy resin (CF/ER) composite. *Compos. Sci. Technol.* 2016; 136: 76-84, <https://doi.org/10.1016/j.compscitech.2016.10.002>.

- S30 G.W. Yuan, B. Yang, Y.H. Chen, et al. Synthesis of a novel multi-structure synergistic POSS-GO-DOPO ternary graft flame retardant and its application in polypropylene. *Compos. Part A-Appl. S.* 2019; 117: 345-356, <https://doi.org/10.1016/j.compositesa.2018.12.006>.
- S31 Y.Z. Feng, C.G. He, Y.F. Wen, et al. Improving thermal and flame retardant properties of epoxy resin by functionalized graphene containing phosphorous, nitrogen and silicon elements. *Compos. Part A-Appl. S.* 2017; 103: 74-83, <https://doi.org/10.1016/j.compositesa.2017.09.014>.
- S32 Y.Q. Shi, B. Yu, Y.Y. Zheng, et al. Design of reduced graphene oxide decorated with DOPO-phosphanomidate for enhanced fire safety of epoxy resin. *J. Colloid Interface Sci.* 2018; 521: 160-171, <https://doi.org/10.1016/j.jcis.2018.02.054>.
